# Supplementary material
Source: publisher figshare collection journal article supplement (https://rs.figshare.com/ndownloader/files/14398157)
Supplement: Supplementary file 1 [file 14398157]

**SUPPLEMENTARY MATERIALS**

**Brain activity during reciprocal social interaction
investigated using conversational robots as control condition**

Birgit Rauchbauer1,2,4, Bruno Nazarian1, Morgane Bourhis1,
Magalie Ochs3, Laurent Prévot4,5 & Thierry Chaminade1

1. Institut de Neurosciences de la Timone, Aix-Marseille Université, CNRS, France
2. Laboratoire de Neurosciences Cognitive, Aix-Marseille Université, CNRS, France
3. Laboratoire d'Informatique et des Systèmes, Aix-Marseille Université, CNRS, France
4. Laboratoire Parole et Langage, Aix-Marseille Université, CNRS, France
5. Institut Universitaire de France, Paris, France
   - - 1. **Experimental set-up**

**Figure S1: Images used in experiment.**


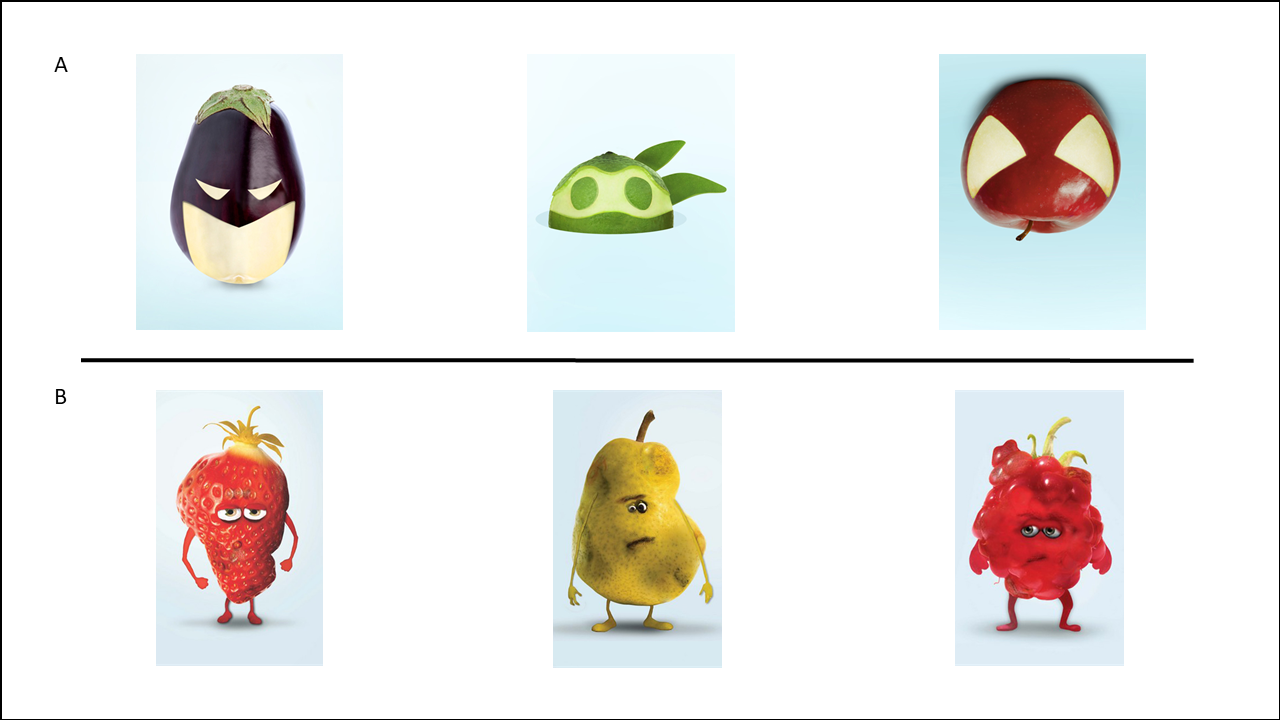


**Figure S1: Images used in experiment.** Anthropomorphized fruits and vegetables appearing (A) as superheroes (in Sessions 1 & 3) and (B) rotten (in sessions 2 & 4) (see Table S1 for details on order)

**Table S1: Image order in sessions during functional magnetic resonance imaging and according to interaction type.**

|  |  | **Sessions 1 & 3**  **Superheroes** | **Sessions 2 & 4**  **Rotten** |
| --- | --- | --- | --- |
| **Interaction type** | **HHI** | Eggplant | Raspberry |
| **HRI** | Apple | Pear |
| **HHI** | Lemon | Strawberry |
| **HRI** | Eggplant | Raspberry |
| **HHI** | Apple | Pear |
| **HRI** | Lemon | Strawberry |

**Table S1: Image order in sessions during functional magnetic resonance imaging and according to interaction type.** HHI: human-human interaction; HRI: human-robot interaction;

**File S1: Scripted conversational elements for the Wizard of Oz control of the robot**

**General statements (for all images)**

**Bienvenue** *(Welcome)*

| Bonjour | *Hello* |
| --- | --- |
| Salut | *Hi* |
| Comment ça va? | *How are you?* |
| Ça va | *It’s ok* |
| Et toi? | *And you?* |
| Bon | *Good* |
| Merci | *Thank you* |
| Je m'appelle Furhat | *My name is Furhat* |

**Accord** *(Agreement)*

| Oui | *Yes* |
| --- | --- |
| Ouais | *Yeah* |
| Ah oui | *Ah yes* |
| Oui, je crois aussi | *Yes, I believe so too* |
| Oui, tu as raison | *Yes, you're right* |
| Oui bien sûr | *Yes of course* |
| Oui, en effet | *Yes indeed* |
| Oui, exactement | *Yes exactly* |
| Oui, je crois aussi. | *Yes, I believe so too* |
| Oui, tu as raison | *Yes, you're right.* |
| Oui bien sûr | *Yes of course* |
| Oui en effet | *Yes indeed* |
| Je suis d'accord | *I agree* |

**Peut-être** *(Maybe)*

| Peut-être... | *Perhaps...* |
| --- | --- |
| Hmmm....peut-être | *Hmmm .... maybe* |
| Oui, ça se pourrait. | *Yes, it could be.* |
| Oui c'est possible | *Yes, it's possible* |
| Je ne suis pas sûr | *I am not sure* |

**Désaccord** *(Disagreement)*

| Non | *No* |
| --- | --- |
| Ah non..... | *Oh no.....* |
| Non, pas du tout. | *Not at all.* |
| Non, je ne crois pas. | *No, I do not think so.* |
| Non, je pense que tu as tort. | *No, I think you're wrong.* |
| Non, je ne pense pas. | *No, I do not think so.* |
| Non c'est impossible | *No, it's impossible* |

**Pensées** *(Thoughts)*

| Je crois | *I believe* |
| --- | --- |
| Je pense | *I think* |
| Tu ne crois pas? | *Do not you think?* |
| Tu ne penses pas? | *You do not think?* |
| Je ne sais pas | *I do not know* |
| Est-ce qu´on peut revenir au sujet? | *Can we come back to the subject?* |
| Qu'est-ce que t'en penses? | *What do you think about it?* |
| Tu as une idée du message? | *Do you have an idea of ​​the message?* |
| Qu'est-ce que tu en dis? | *What do you say?* |
| N'est-ce pas? | *Is it not?* |

- - - 1. **Images of anthropomorphized fruits and vegetables as superheros**

**Idées d’un message/Super-héroes** *(Ideas about the message (of the advertisement campaign)/Superheros*

| Elle/Il combat peut-être la mauvaise nourriture | *Maybe it fights bad food* |
| --- | --- |
| Elle/Il combat les pesticides peut-être | *Maybe it fights pesticides* |
| Peut-être qu'elle combat les mauvaises habitudes alimentaires | *Maybe it fights bad eating habits* |
| C’est une campagne contre les pesticides ? | *Is it a campaign against pesticides?* |
| C'est une campagne de pub ciblant les enfants ? | *Is it an advertising campaign targeting children?* |
| C'est peut-être une pub pour manger plus sainement ? | *Maybe it's an ad to eat healthier?* |
| Peut-être que c'est le logo d'un vendeur de fruits? | *Maybe it's the logo of a fruit seller?* |
| Ça peut être une pub pour manger des fruits locaux ? | *Is it maybe an ad to eat local fruit?* |
| Ça peut être une pub pour manger plusse de fruit ? | *Is it maybe an ad to eat more fruit?* |
| C'est une pub pour les producteurs de fruits? | *Is it an ad for fruit producers?* |
| C'est un logo d'un club de végétariens ? | *Is it a logo of a vegetarian club?* |

**Apple**

| C'est une pomme | *It's an apple* |
| --- | --- |
| Moi, je crois que c'est une pomme | *I think it's an apple* |
| C'est une pomme rouge | *It's a red apple* |
| Cette pomme a des grands yeux | *This apple has big eyes* |
| Cette pomme est à l'envers | *This apple is upside down* |
| Quelqu'un a découpé un visage dans la pomme | *Someone carved a face in the apple* |
| Elle est appétissante, cette pomme | *It is appetizing, this apple* |
| Elle a une peau brillante | *It has a shiny skin* |
| La pomme a une tige brune | *The apple has a brown stem* |
| Elle ressemble à un super-héro | *It looks like a super-hero* |
| Quelqu'un a découpé un visage qui ressemble à un super-héro | *Someone carved a face that looks like a superhero* |
| Ses yeux ressemblent à ceux d'un super-héro | *Its eyes are like those of a superhero* |
| On dirait un super héro cette pomme | *It looks like a super hero this apple* |
| On dirait un spiderman cette pomme | *It looks like spiderman this apple* |
| On dirait ante man cette pomme | *It looks like ant-man this apple* |
| La pomme a l'air méchante. | *The apple looks nasty* |
| Elle a l'air un peu agressive | *It looks a bit aggressive* |
| Elle semble déterminée | *It seems determined* |
| Elle semble être en colère | *It seems to be angry* |
| Elle a l'air forte | *It looks strong* |

**Aubergine**

| C'est une aubergine | *It's an eggplant* |
| --- | --- |
| Moi, je crois que c'est une aubergine | *I think it's an eggplant* |
| C'est une aubergine noire | *It is a black eggplant* |
| Elle a une grande bouche | *It has a big mouth* |
| La bouche semble être ouverte. | *The mouth seems to be open.* |
| L'aubergine a des yeux | *Eggplant has eyes* |
| On dirait qu’elle a des cheveux vert | *Looks like it has green hair* |
| Quelqu'un a découpé un visage dans l'aubergine | *Someone cut a face in the eggplant* |
| Elle a le même visage qu'une citrouille d'halloween | *It has the same face as a halloween pumpkin* |
| C'est peut-être pour halloween | *It may be for halloween* |
| Elle ressemble aussi à un super-héro | *It also looks like a superhero* |
| Quelqu'un a découpé un visage qui ressemble à un super-héro | *Someone carved a face that looks like a superhero* |
| Les yeux et la bouche ressemble à ceux d'un super-héro | *The eyes and mouth are like those of a superhero* |
| Elle ressemble à batman | *It looks like batman* |
| Elle a l'air plus méchante que la pomme | *It looks meaner than the apple* |
| On dirait qu’elle a un rire sardonique | *Looks like it has a sardonic laugh* |
| Elle a l'air agressive | *It looks aggressive* |
| Elle semble déterminée, comme la pomme | *It seems determined, like the apple* |
| Elle semble être plus en colère que la pomme | *It seems to be angrier than the apple* |
| Elle a l'air forte, comme la pomme | *It looks strong, like the apple* |
| Elle combat peut-être la mauvaise nourriture avec la pomme | *It may be fighting bad food with the apple* |
| Elle combat les pesticides avec la pomme peut-être | *Maybe it fights pesticides with the apple* |
| Peut-être qu'elle combat les mauvaises habitudes alimentaires avec la pomme | *Maybe it fights bad eating habits with the apple* |
| Les deux sont de la même pub? | *Both are from the same ad?* |
| Je crois que c'est une fille | *I think it's a girl* |
| Le mot aubergine c'est feminin | *The word aubergine is feminine* |
| C'est un logo d'un club de végétariens, comme la pomme? | *Is it a logo of a vegetarian club, like the apple?* |

**Citron**

| C'est un citron | *It's a lemon* |
| --- | --- |
| Moi, je crois que c'est un citron | *I think it's a lemon* |
| C'est un demi citron | *It's half a lemon* |
| C'est un citron vert | *It's a lime* |
| C'est un citron avec un bandeau | *It's a lemon with a headband* |
| Quelqu'un a découpé un bandeau dans le citron | *Someone cut a blindfold in the lemon* |
| Il a un visage le citron | *It has face this lemon* |
| C'est un drôle de citron | *It's a funny lemon* |
| Il ressemble à un super-héros comme les autres | *It looks like a superhero like the others* |
| Quelqu'un a découpé des yeux qui ressemble à un super-héro | *Someone cut out eyes that look like those of a superhero* |
| Il ressemble à un ninja | *It looks like a ninja* |
| Il n'est pas méchant comme les deux autres | *It is not mean like the other two* |
| Il n'est pas aussi agressif que les autres | *It is not as aggressive as the others* |
| Il semble fiable | *It seems reliable* |
| Il n'est pas autant en colère que les autres | *It is not as angry as the others* |
| Il a l'air fort, comme les autres | *It looks strong, like the others* |
| Il combat la mauvaise nourriture avec les autres? | *It fights bad food with the others?* |
| Il combat les pesticides avec les autres peut-être? | *It fights pesticides with the others maybe?* |
| Il combat les mauvaises habitudes alimentaires avec les autres? | *It fights bad eating habits with the others?* |
| C'est une pub pour les producteurs de fruits, comme les autres? | *It's an advertisement for fruit producers, like the others?* |
| Ca peut être une pub pour manger des fruits locaux, comme les autres? | *Can it maybe be an ad to eat local fruits, like the others ?* |
| c'est un logo d'un club de végétariens, comme les autres? | *Is it a logo of a vegetarian club, like the others ?* |
| Je crois que c'est un garçon | *I think it's a boy* |
| C'est - LE - citron; C'est masculin | *It is - THE - lemon; It's masculine* |

- - - 1. **Images of anthropomorphized rotten fruits**

**Idées d’un message/Rotten fruits** *(Ideas about the message (of the advertisement campaign)/Rotten fruits*

| Peut-être que quelqu'un l'a frappée? | *Maybe someone hit her?* |
| --- | --- |
| Elle est pourrie parce qu’elle vient de loin? | *It is rotten because it comes from far away?* |
| Peut-être que c'est une pub contre la violence? | *Maybe it's an ad against violence?* |
| C'est une campagne pour les fruits locaux qui ne viennent pas de loin? | *Is it a campaign for local fruits that do not come from far away?* |
| C’est une campagne pour les pesticides? | *Is this a campaign for pesticides?* |
| C'est une campagne de pub ciblant les enfants? | *Is this an advertising campaign targeting children?* |
| N’est-ce pas une compagne pour les producteurs de fruits? | *Isn’ t it a campaign for fruit producers?* |
| C'est peut-être une campagne pour favoriser les fruits locaux? | *Maybe it's a campaign to promote local fruit?* |
| Et si c’était une campagne contre les pesticides? | *And if it was a campaign against pesticides?* |
| On dirait une pub pour des producteurs de fruits? | *Looks like an advert for fruit producers?* |

**Pear**

| C'est une poire | *It's a pear* |
| --- | --- |
| C'est une poire jaune | *It's a yellow pear* |
| Elle a des taches brunes | *It has brown spots* |
| C'est une poire pourrie | *It's a rotten pear* |
| C'est une poire moche | *It's a lousy pear* |
| Elle est déformée | *It is deformed* |
| La poire est un peu abimée | *The pear is a little damaged* |
| C'est une poire avec des bras | *It's a pear with arms* |
| Ses bras pendent | *Its arms hang* |
| Elle a des jambes | *It has legs* |
| Elle a un visage | *It has a face* |
| Elle a une bouche | *It has a mouth* |
| Elle a une bouche étroite | *It has a narrow mouth* |
| Elle a des yeux noir | *It has black eyes* |
| Les yeux ne sont pas de la même taille | *The eyes are not the same size* |
| Un des yeux est plus grand que l'autre | *One of the eyes is bigger than the other* |
| Elle a des siles | *It has siles* |
| L'image est différente des précédentes. | *The picture is different from the previous ones.* |
| La poire semble triste | *The pear seems sad* |
| Elle n’a pas l'air contente | *It does not look happy* |
| Elle semble malheureuse | *It seems unhappy* |
| La poire a l'air malade | *The pear looks sick* |
| Elle paraît faible. | *It seems weak.* |
| Elle semble fatiguée. | *It seems tired.* |
| Je crois que c'est une fille | *I think it's a girl* |
| C'est - LA - poire. C’est féminin | *That's - LA - pear. It's feminine* |

**Framboise**

| C'est une framboise | *It's a raspberry* |
| --- | --- |
| Moi, je crois que c'est une framboise | *I think it's a raspberry* |
| C'est une framboise rouge. | *It's a red raspberry* |
| Cette framboise n’est pas très jolie | *This raspberry is not very pretty* |
| Elle est un peu pourrie | *It's a little rotten* |
| C'est une framboise moche | *It's an ugly raspberry* |
| Elle est déformée, comme la poire | *It is distorted, like pear* |
| Elle est aussi un peu abimée | *It is also a little damaged* |
| Elle a des bras | *It has arms* |
| Elle a des bras trop courts | *It has too short arms* |
| Elle a des jambes | *It has legs* |
| Elle a des genou courbés | *It has curved knees* |
| Elle a un visage | *It has a face* |
| Elle a des yeux rond | *It has round eyes* |
| Elle a des yeux marrons | *It has brown eyes* |
| Elle a une bouche | *It has a mouth* |
| Elle a une bouche étroite | *It has a narrow mouth* |
| Elle est peut-être triste car elle est pourrie ? | *It may be sad because it is rotten?* |
| Elle semble triste | *It seems sad* |
| Elle n’a pas l'air contente | *It does not look happy* |
| Elle semble malheureuse | *It seems unhappy* |
| La poire a l'air malade | *The pear looks sick* |
| Elle semble faible | *It seems weak* |
| Elle regarde vers la gauche | *It looks to the left* |
| Comme la poire | *Like pear* |
| Je crois que c'est une fille | *I think it's a girl* |
| C'est - LA - framboise. C’est féminin. | *That's - THE - raspberry. It's feminine* |

**Fraise**

| C'est une fraise | *It's a strawberry* |
| --- | --- |
| Moi, je crois que c'est une fraise | *I think it's a strawberry* |
| C'est une fraise rouge. | *It's a red strawberry* |
| Cette fraise est déformée | *This strawberry is deformed* |
| C'est une fraise pourrie | *It's a rotten strawberry* |
| C'est une fraise moche | *It's a lousy strawberry* |
| Elle est déformée | *It is deformed* |
| La fraise est un peu abimée | *The strawberry is a little damaged* |
| La fraise est aussi pourrie | *The strawberry is also rotten* |
| Elle est un peu abimée | *It is a little damaged* |
| Cette fraise a des bras. | *This strawberry has arms* |
| Elle a des jambes | *It has legs* |
| Elle a un visage | *It has a face* |
| Elle a une bouche ronde | *It has a round mouth* |
| On dirait qu'elle a des cheveux verts | *It looks like it has green hair* |
| Elle a des yeux noirs. | *It has black eyes* |
| C'est une fraise triste | *It's a sad strawberry* |
| Elle n’a pas l’air contente | *It does not look happy* |
| Cette fraise est plutôt malheureuse | *This strawberry is rather unhappy* |
| Elle semble faible et molle | *It seems weak and limp* |
| Elle est fatiguée | *It's tired* |
| Elle est peut-être triste car elle est pourrie? | *Maybe it is sad because it is rotten?* |
| Peut-être est-elle malade et devenue toute pourrie? | *Perhaps it is sick and became all rotten?* |
| Peut-être que quelqu'un l'a frappée? | *Maybe someone hit her?* |
| Elle est moche parce qu’elle vient de loin? | *Is it ugly because it comes from far away?* |
| Elle semble malheureuse | *It seems unhappy* |
| Elle a l'air malade | *It looks sick* |
| Elle semble faible | *It seems weak* |
| Elle regarde vers la gauche | *It looks to the left* |
| Comme les deux autres | *Like the other two* |
| Comme la poire et la framboise | *Like pear and raspberry* |
| Je crois que c'est une fille | *I think it's a girl* |
| C'est - LA - fraise. C’est féminin. | *That's - THE - strawberry. It's feminine* |

**File S1: Scripted conversational elements for the Wizard of Oz control of the robot.** Original French statements, English translation in italics.

- - - 1. **Additional Methods (Preliminary)**
  1. **Behavioral Analyses of Conversation : Transcription**

Audio files of conversation were denoised from scanner noise, individually for each subject using the noise reduction filter by Sox (<http://sox.sourceforge.net>) with a float value individually set between 0.01 and 0.5. The denoised file was pre-segmented into Inter-Pausal Units (IPUs) for transcription with an individual coefficient with a float value of between 0.2 and 0.95. This coefficient applies to the mean of the distribution of the root mean square (RMS) of the audio file, that allows to determine the volume threshold to assign the label "silence" or "ipu" automatically to each analysis window. An IPU is a block of speech in between silent pauses lasting at least 200 ms (Blache, Bertrand, & Ferré, 2009).IPUs were furthermore extracted for the audio files of the confederate. IPUs and denoising was visually inspected using Praat (Boersma, 2002). Transcribed files for each interlocutor were uploaded into SPPAS, version 1.9.9 ([www.sppas.org/](http://www.sppas.org/); Bigi, 2015) and combined for visualization purposes of phonologically transcribed conversations (the original in French and translated into English in supplementary material) of both HHI and HRI (see files S2 – S5). To access the transcription of conversations please follow the link to the data repository (<https://hdl.handle.net/11403/convers>).

- - - 1. **Additional results**

**5.1 Conversation transcript**

**5.1.1 Examples of human-human interaction**

**File S2: Example of human-human interaction (male confederate):** Visualization of a transcribed conversation, merged across the two interlocutors using Praat (original merged text file was simplified for visualization purposes); shown are Inter-Pausal Units (IPUs) with timestamps. Conversational elements of the participant are presented in green, and of the confederate, respectively the robot, in blue; English translation is presented right below the corresponding statements in italics; *** or * indicate inaudible speech segments or scanner noise; @ indicates laughter.

**IPU 1:** 1.15 - 3.95

bon franchement franchement t'as déjà cueilli des fruits quand t'étais petit

*frankly frankly did you already picked fruit when you were a kid*

**IPU_1:** 4.28 - 5.61

j'en j'en ai dans mon jardin hein j'ai le cerisier on est train de faire la récolte de cerises en ce moment

*I have some in my garden, huh, I have the cherry tree we are doing the cherry harvest right now*

**IPU 2:** 8.23 - 9.65

ah ouais en plus en plus c'est la saison

*oh yeah moreover moreover it is the season*

**IPU_2:** 9.95 - 10.17

ouais

*yeah*

**IPU_3:** 10.06 - 11.79

c'est la saison elles sont elles sont bonnes en ce moment

*this is the season they are they are good right now*

**IPU_ 3:** 11.92 - 14.83

elles sont elles sont petites elles sont brillantes comme la pomme

*they are they are small they are bright like the apple*

**IPU_4:** 15.28 - 18.07

ouais ah et toi donc toi t'as des très très beaux fruits

*yeah ah and you so you have very very beautiful fruits*

**IPU_4 :** 17.78 - 18.05

ouais

*yeah*

**IPU_5:** 18.34 - 18.61

y a pas

*there’s no*

**IPU_5:** 18.41 - 18.57

tu

*you*

**IPU_6 :** 18.8 - 21.07

pas de vers ils brillent tu te vois dedans

*no worms they shine you see you them inside*

**IPU_7 :** 21.03 - 21.97

sérieux et tu les traites

*seriously and you treat them*

**IPU_7:** 22.51 - 22.75

non

*no*

**IPU_7:** 23.94 - 29.74

ah ouais donc c'est peut-être c'est peut-être l'argument local hein Fuhrat il semble insister sur l'argument pesticide

*oh yeah so maybe that's maybe the local argument huh Furhat he seems to insist on the pesticide argument*

**IPU_8:** 28.34 - 28.48

*

**IPU_9:** 30.28 - 34.45

ouais mais enfin peut-être il dit n'- -fin je sais pas j'ai pas discuté avec Fuhrat mais peut-être il dit n'importe quoi

*yeah but finally maybe he says no - well I do not know I have not discussed with Furhat but maybe he says anything*

**IPU_10 :** 34.81 - 37.73

il t'as dit que c'était une pub pour défendre les pesticides

*he told you it was an ad to defend pesticides*

**IPU_8 :** 37.88 - 42.63

enfin il m'a dit est ce que tu penses que c'est une campagne pour les pesticides je lui ai dit ben si c'est le cas c'est bien fait

*finally he told me do you think this is a campaign for pesticides I told him well if it is the case it is well done*

**IPU_9 :** 42.97 - 43.15

@

**IPU_11 :** 43.30 - 43.59

ouais

*yeah*

**IPU_12 :** 44.00 - 44.65

t'es

*you’re*

**IPU_10 :** 44.32 - 45.41

mais ce serait dommage

*but it would be a pity*

**IPU_13 :** 45.55 - 46.19

*

**IPU_14 :** 46.61 - 47.43

euh

*euh*

**IPU_15 :** 7.68 - 49.17

d'un autre côté ils ont de l'argent

*on the other hand they have money*

**IPU_16 :** 49.39 - 51.17

euh peut-être ils peuvent faire de l'IRM aussi

*uh maybe they can do MRI too*

**IPU_11 :** 51.82 - 53.43

ouais @

*yeah*

**IPU_17 :** 52.15 - 52.49

*

**IPU_18 :** 53.50 - 54.29

c'est un moyen

*it is a a mean/medium*

**IPU_12:** 53.78 - 55.03

vas y comme tu dénonces

*go ahead as you denounce*

**IPU_19 :** 55.46 - 56.01

euh @

**IPU_20 :** 56.30 - 58.17

y a personne qui écoute alors euh m'en fous

*there is nobody who listens so uh do not care*

**File S3: Example of human-human interaction (female confederate):** details as in File S2.

**IPU 1:** 1.76 - 2.39

euh

*euh*

**IPU 2 :** 3.78 - 5.47

toujours pareil hein c'est une poire

*always the same huh it's a pear*

**IPU 1:** 5.48 - 5.69

ouais

*yeah*

**IPU 3 :** 5.69 - 6.85

démoralisée toute

*demoralized all*

**IPU 4: 7.97 - 8.57**

Abimée

*Damaged*

**IPU 2**: 8.92 - 9.21

hum hum

*hum hum*

**IPU 5:** 9.62 - 10.54

comme si elle avait pris

*as if It had taken*

**IPUs_3:**11.98 - 12.75

ouais ouais ouais

*yeah yeah yeah*

**IPU 4:** 13.06 - 13.47

Complètement

*Completely*

**IPU 5:** 14.10 - 15.53

euh une victime en quelques sortes

*uh a victim somehow*

**IPU 6 :** 15.83 - 16.10

*

**IPU 6:** 16.34 - 16.59

Ouais

*Yeah*

**IPU 7:** 16.99 - 17.31

Ouais

*Yeah*

**IPU 8:** 17.55 - 17.93

fort possible

*quite possible*

**IPU 9:** 19.47 - 20.65

c'est un peu cet aspect là ouais

*it's a bit that aspect yeah*

**IPU 10 :** 21.67 - 26.49

* tout le monde -fin on l'a ouais maltraitée * on l'a mise dans un coin on a pas fait attention

***** *everyone - finally yes we mistreated it * we put it in a corner we did not pay attention*

**IPU 6:** 26.89 - 27.04

Ouais

*Yeah*

**IPU 7:** 27.3 - 27.68

hum hum

*hum hum*

**IPU 12:** 28.86 - 29.05

ouais

*yeah*

**IPU 8:** 29.99 - 30.20

ouais

*yeah*

**IPU 9:** 31.06 - 32.39

et euh ouais

*and euh yeah*

**IPU 10:** 32.56 - 33.99

ce que je te disais tout à l'heure ça pourrait être une

*what I told you just now it could be a*

**IPU 11 :** 34.34 - 38.79

condamnation en mode société de con- anti euh contre la société de consommation ou euh

*condemnation in a society trend of con- anti uhh against the consumer society or um*

**IPU 12 :** 40.56 - 41.51

quelque chose comme ça tu vois

*something like that you see*

**IPU 13:** 42.09 - 42.47

ouais

*yeah*

**IPU 14 :** 43.3 - 45.25

contre le fait de produire beaucoup

*against producing a lot*

**IPU 15 :** 45.46 - 47.53

et en grande quantité sans euh

*and in large quantities without uh*

**IPU 16 :** 48.15 - 50.19

sans voir la qualité et qu'au final

*without seeing the quality and in the end*

**IPU 13 :** 50.59 - 50.97

hum hum

*hum hum*

**IPU 17 :** 50.74 - 51.35

*

**IPU 18 :** 51.72 - 53.23

fruits bio euh

*organic fruit uh*

**IPU 19 :** 53.44 - 54.47

sont de meilleurs qualités

*are of better qualities*

**IPU 20 :** 54.98 - 55.35

healthy

*healthy*

**IPU 21 :** 55.64 - 55.95

*

**IPU 22 :** 56.36 - 56.71

moins bien

*less good*

**IPU 23 :** 56.91 - 57.23

fin ils sont

*in they are*

**IPU 24 :** 58.09 - 58.95

produits en moins grande quantité

*produced in smaller quantity*

**5.1.2 Example of human-robot interactions**

**File S4: Example of human-robot interaction (male confederate):** details as in File S2

**IPU_1:** 1.07 - 3.52

là encore une fois il s'agit de l'aubergine

*here again it is about the eggplant*

**IPU_2:** 3.84 - 4.71

euh

*euh*

**IPU_1:** 4.28 - 5.61

elle ressemble à batman

*it looks like batman*

**IPU_3:** 5.83 - 7.53

oui en effet elle ressemble à batman

*yes indeed it looks like batman*

**IPU_4:** 7.84 - 12.97

ce que j'avais pas remarqué précédemment c'est que le pédoncule au dessus de l'aubergine

*What I had not noticed before is the peduncle on top of the eggplant*

**IPU_5:** 13.20 - 17.41

lui donne comme une coupe de cheveux assez étrange qui ressemble pas à batman

*gives it like a weird haircut that does not look like batman*

**IPU_2:** 16.21 - 16.65

Oui

*yes*

**IPU_3:** 16.88 - 17.57

tu as raison

y*ou are right*

**IPU_6:** 18.82 - 19.43

***

*inaudible*

**IPU_4:** 19.44 21.47

elle a l'air plus méchante que la pomme

*it looks meaner than the apple*

**IPU_7:** 22.47 - 24.67

elle a l'air plus méchante que la pomme oui

*it* *looks meaner than the apple yes*

**IPU_8:** 25.09 - 26.22

batman euh

*batman euh*

**IPU_9:** 26.44 - 27.31

Globalement

*overall*

**IPU_10:** 27.6 - 28.69

un peu plus dark que

*a little darker than*

**IPU_11:** 28.89 - 29.83

spiderman

*spiderman*

**IPU_5:** 30.08 - 30.47

oui

*yes*

**IPU_12:** 31.2 - 33.67

après oui ça semble être lié à l'alimentation

*after yes it seems to be related to food*

**IPU_13:** 33.88 - 35.19

à la promotion de

*to the promotion of*

**IPU_14:** 35.86 - 37.11

de manger des fruits et légumes

*to eat fruits and vegetables*

**IPU_15:** 37.30 - 41.35

***

*inaudible*

**IPU_6:** 37.87 - 40.31

c'est une campagne de pub ciblant les enfants

*it's an advertising campaign targeting children*

**IPU_16:** 41.58 - 44.76

pour rendre ludique les aliments les fruits légumes

*to make playful foods vegetables fruits*

**IPU_7:** 46.04 - 48.61

ça peut être une pub pour manger plus de légumes

*it is maybe an ad to eat more vegetables*

**IPU_17:** 46.68 - 48.65

***

**IPU_18:** 48.83 - 50.31

***

**IPU_19:** 50.64 - 51.74

ça fait sens

*that makes sense*

**IPU_8:** 50.87 - 53.39

ça peut être une pub pour manger des légumes locaux

*it is maybe an ad to eat local vegetables*

**IPU_20:** 54.99 - 58.64

locaux oui pourquoi pas produisent des aubergines des pommes

*local yes why not produce eggplants apples*

**File S5: Example of human-robot interaction (female confederate):** Details as in File S2

**IPU_1 :** 3.46 – 4.5

c'est une fraise

*it is a strawberry*

**IPU_2 :** 7.51 - 8.52

c'est une fraise

*it is a strawberry*

**IPU_3**:8.88 - 10.33

qui a l'air énervée

*that looks annoyed*

**IPU_2:** 12.13 – 13.6

comme la poire et la framboise

*like the pear and the raspberry*

**IPU_4:**14.23 - 16.73

oui elle doit être fatiguée des trajets qu'elle fait

*yes It must be tired of the journeys It makes*

**IPU_3:**18.89 - 20.62

elle est moche parce qu'elle vient de loin

*It is ugly because It comes from afar*

**IPU_5**: 21.88 - 22.89

c'est fort possible

*that’s highly possible*

**IPU_4 :** 22.04 - 23.05

qu'est ce que tu en dis

*what do you say*

**IPU_6:**23.88 - 24.91

je suis d'accord avec toi

*I agree with you*

**IPU_5:** 28.16 - 29.16

oui bien sûr

*yes of course*

**IPU_7:** 34.52 - 35.07

*

**IPU_8:**35.25 - 35.95

c'est possible

*that’s possible*

**IPU_9:** 46.58 - 48.75

oui par contre les légumes n'étaient pas abimés

*yes on the other hand the vegetables weren’t damaged*

**5.2 Participants’ movements during scanning**

**Figure S2: Assessment of participants’ movements during scanning.**


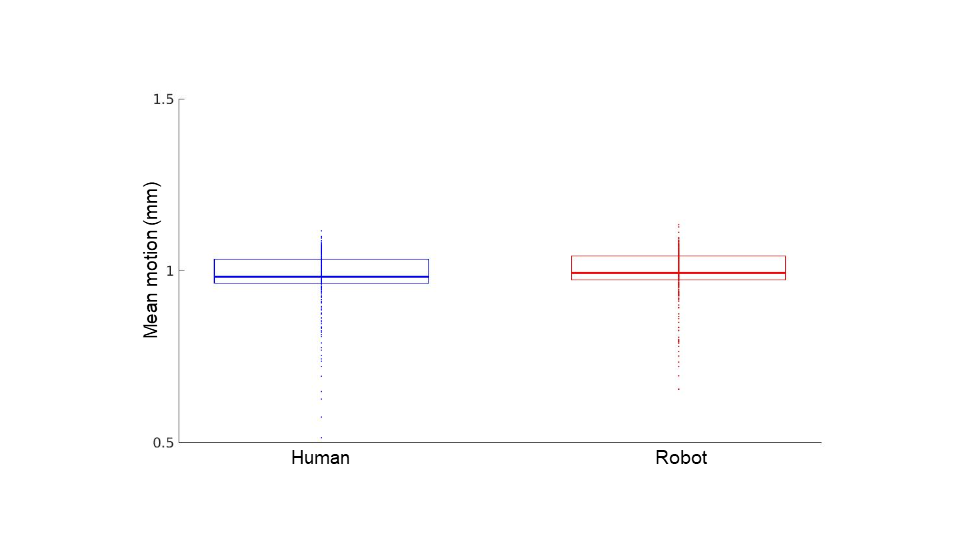


**Figure S2: Assessment of participants’ movements during scanning.** Mean motion of voxels (in mm) during functional magnetic resonance imaging per condition; “Human” denotes human-human interaction; “Robot” denotes human-robot interaction;

**4. Links to online data repositories**

- Transcribed linguistic data on Ortolang (https://www.ortolang.fr): <https://hdl.handle.net/11403/convers>
- fMRI group data on Neurovault (<https://neurovault.org/>): [/collections/ASGXRWEM/](https://neurovault.org/collections/ASGXRWEM/)
- fMRI raw data on OpenNeuro (<https://openneuro.org/>): <https://openneuro.org/datasets/ds001740>

**References**

Bigi, B. (2015). SPPAS-multi-lingual approaches to the automatic annotation of speech. *The Phonetician-International Society of Phonetic Sciences*, (111–112), 54–69.

Blache, P., Bertrand, R., & Ferré, G. (2009). Creating and exploiting multimodal annotated corpora: the ToMA project. In *Multimodal corpora* (pp. 38–53). Springer.

Boersma, P. (2002). Praat, a system for doing phonetics by computer. *Glot International*, *5*.
